# Supplementary material
Source: MDPI journal article supplement (https://www.mdpi.com/2071-1050/14/19/12194)
Supplement: s1 [file s1]

# Electronic Supplementary Information (ESI)

## Evaluation of Nutrient Composition and Antioxidant Property of Six Wild Edible Fruits of Tripura, North-East India

Suresh Chandra Biswas<sup>1,2</sup>, Pramanand Kumar<sup>3</sup>, Raj Kumar<sup>4</sup>, Subrata Das<sup>3,\*</sup>, Tarun  
Kumar Misra<sup>1</sup>, Dipankar Dey<sup>2</sup>

<sup>1</sup>Department of Chemistry, National Institute of Technology Agartala, Tripura-799046, India

<sup>2</sup>Subject Matter Specialist-Home Science, Krishi Vigyan Kendra, Khowai Tripura-799207

<sup>3</sup>Department of Chemistry, National Institute of Technology Patna, Bihar- 800005, India

<sup>4</sup>Department of Environmental Science, Central University of South Bihar, Gaya-824236

\*Corresponding Authors: E-mail: [subratad@nitp.ac.in](mailto:subratad@nitp.ac.in) (SD)

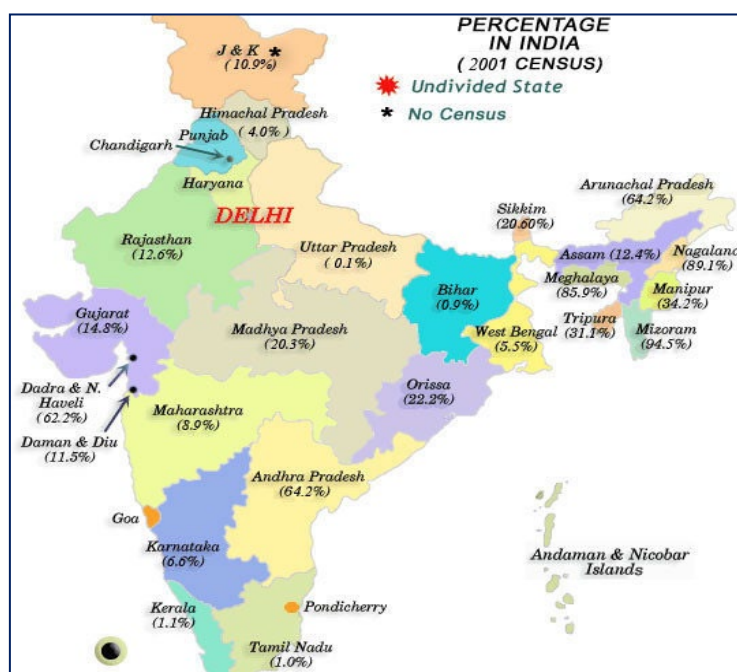

Figure S1: Indian Communities Map

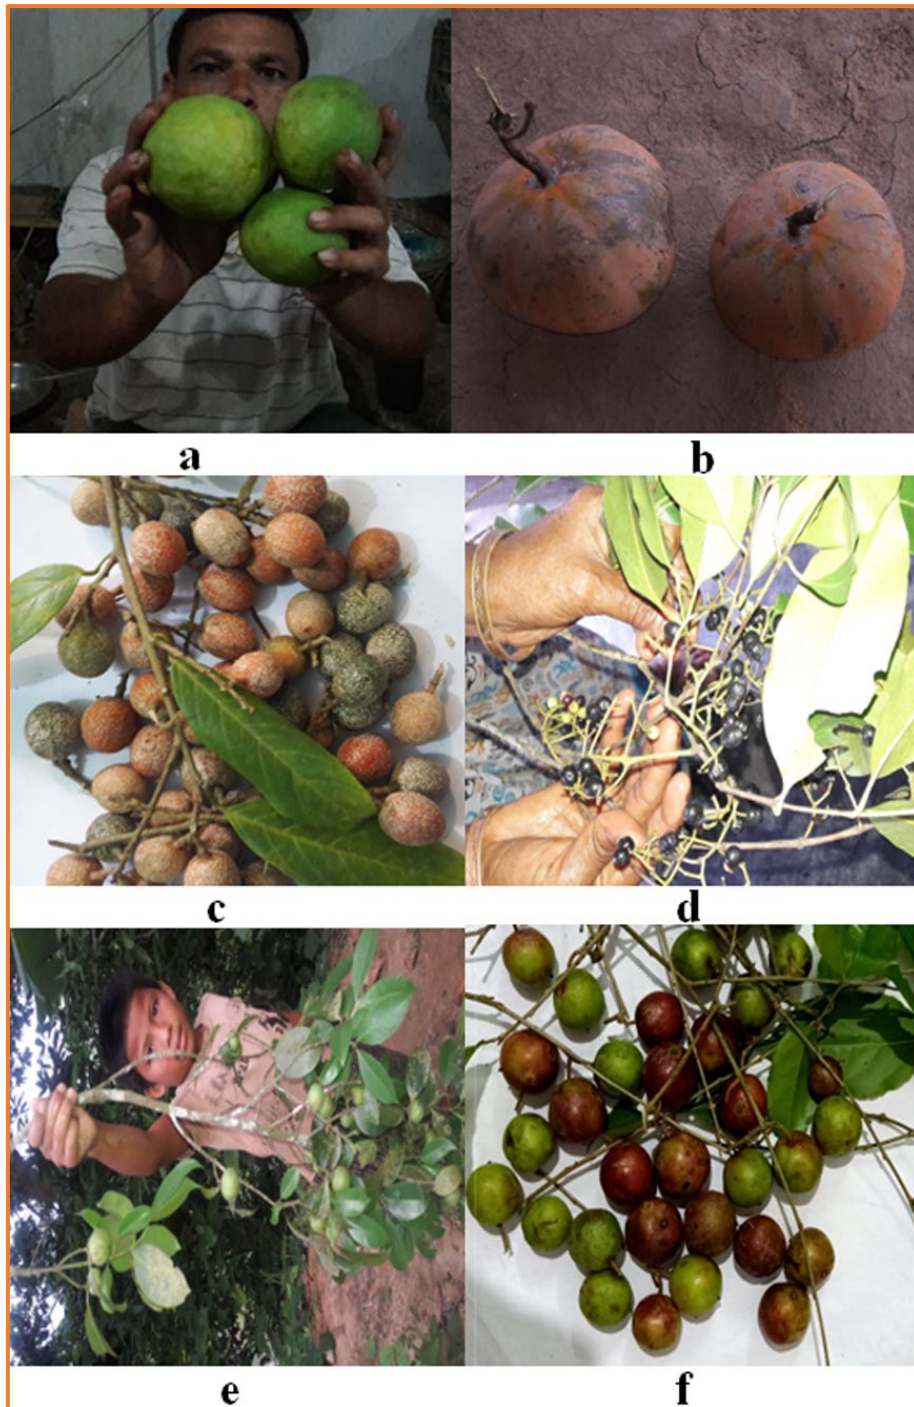

**Figure S2.** Photographs of the wild edible fruits: (a) wild orange (*Citrus macroptera*), (b) Chinese lard (*Hodgsoniamacrocarpa*Cogn.), (c) madhabilata (*Stixissuaveolens*Roxb. Pierre), (d) wild small black jamun (*Syzygiummassamicum*), (e) gamboge (*Garcinia gummi-gutta* (L.) Robs), and (f) Indian coffee plum (*Flacourtiajangomas*Lour. Raeusch).

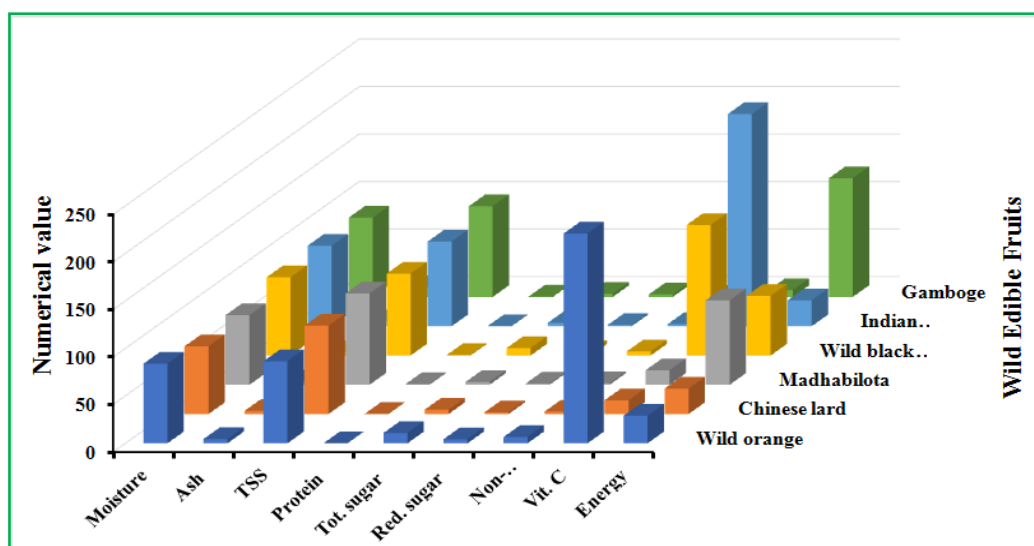

**Figure S3.** Macronutrient compositions of the six wild edible fruits of Tripura. Units of the nutrients as in Table 1.

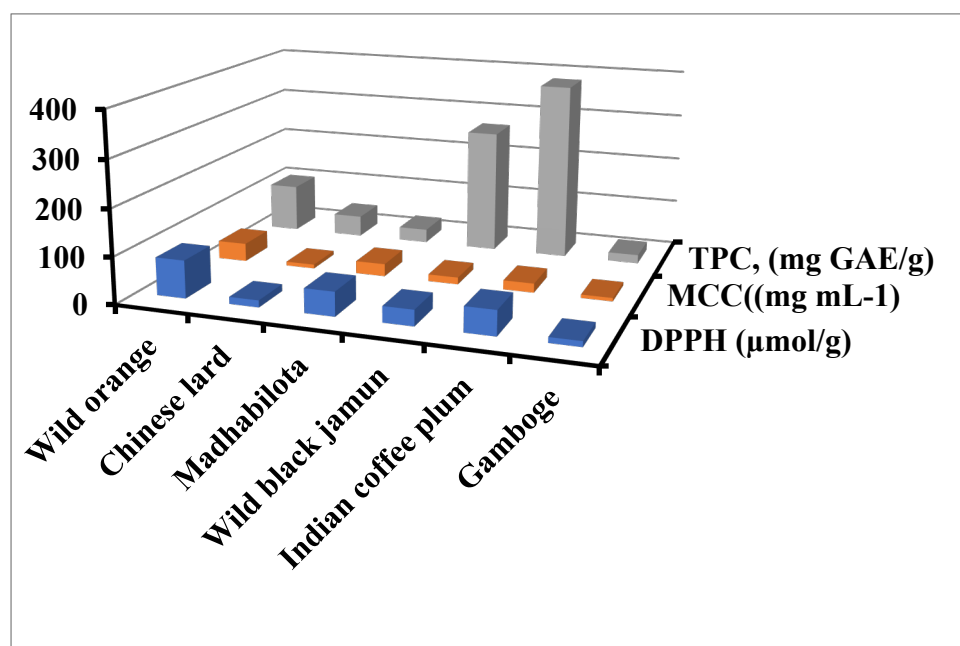

**Figure S4.** Antioxidant activity of methanol extract of the fruits.

**Table S1.** List of the six wild edible fruits of Tripura state with identification and authentication [15]

| Sl. No. | Botanical name<br>*(IPNI)                 | Family        | Local Name                                                    | Time of availability | Taste                      | Uses: folk medicine                                                                                                                                                                                     | Voucher specimen number                        | Identified Institute                  |
|---------|-------------------------------------------|---------------|---------------------------------------------------------------|----------------------|----------------------------|---------------------------------------------------------------------------------------------------------------------------------------------------------------------------------------------------------|------------------------------------------------|---------------------------------------|
| 1       | Citrus macroptera Montrouz.               | Rutaceae      | B-Sathkora<br>K-Chatukora<br>R-saataokra<br>(Wild orange)     | Sept-Nov             | Sour                       | Fruits are eaten raw. Fruits peel use for meat tenderization, also , gastritis, kidney stone treatment                                                                                                  | SB-34,<br>10.10.2015,<br>Tulasikhar,<br>Khowai | Tripura University and TERI, Guwahati |
| 2       | <i>Hodgsonia-macrocarpa</i> (Blume) Cogn. | Cucurbitaceae | B-Bon kumra<br>K-Thaibai<br>R-Thaibai<br>(Chinese Lard Plant) | Apr-July             | Bitter in taste and oily   | Fruits kernel taken as alternative use of oil in curry and also taken by roasted the kernel and extracted oil from kernel used as folk medicine , burned leaves are used in wound healing, Constipation | SB-26,<br>05.07.2016,<br>Manu, Dhalai          | Tripura University and TERI, Guwahati |
| 3       | <i>Stixissuaveolens</i> (Roxb.) Baill.    | Capparaceae   | B- Madhabi<br>K- Majeelata<br>R- Mooni                        | May-July             | Taste like ripen date palm | Fruits are used for consumption, also use folk                                                                                                                                                          | SB- 22,<br>4.06.2016,                          | Tripura University and                |

|   |                                                      |            |                                                                      |            |                                    |                                                                                                                                            |                                            |                                       |
|---|------------------------------------------------------|------------|----------------------------------------------------------------------|------------|------------------------------------|--------------------------------------------------------------------------------------------------------------------------------------------|--------------------------------------------|---------------------------------------|
|   |                                                      |            |                                                                      |            |                                    | medicine for heart disease, asthma                                                                                                         | Tablabari, Khowai                          | TERI, Guwahati                        |
| 4 | <i>Syzygium assamicum</i> (Biswas & Purkay.) Raizada | Myrtaceae  | B-Khudikalajam<br>K-Jamuk<br>R-Jamuk<br>(Wild small black jamun)     | May-Sept   | Slightly bitter in taste and sweet | Seeds use for diabetes                                                                                                                     | SB-64<br>23.8.2016<br>Ajagartila, Khowai   | Tripura University and TERI, Guwahati |
| 5 | <i>Flacourtiajanglemas</i> (Lour.)Raeusch            | Salicaceae | B-Tipafol / Paniol<br>K- Tekroi<br>R- Tekrui<br>(Indian coffee Plum) | July - Nov | Mild sour and tangy taste          | Consumed as raw and cooked, salt-dried, jam, marmalade, leaves and fruits used against diarrhoea, dried leaves effectively for bronchitis. | SB-28,<br>23.06.2015,<br>Tablabari, Khowai | Tripura University and TERI, Guwahati |
| 6 | <i>Garcinia gummituta</i> L. Roxb.                   | Clusiaceae | B-Kowagota<br>K-Kouk<br>R-Akouk<br>(Gambooge)                        | May-July   | Taste in sour and sweet            | Consumed as raw fruits as juice, prepared pickles, use folk medicine for treatment for Diarrhoea                                           | SB-46<br>12.07.2016,<br>Tablabari, Khowai  | Tripura University and TERI, Guwahati |

**Table S2.** Principal components (PC) and component loadings extracted from different parameters analysed from six fruits were used to interpret the PC

| PCs                                | PC1          | PC2          | PC3           | PC4          | PC5          |
|------------------------------------|--------------|--------------|---------------|--------------|--------------|
| Eigen value                        | 9.069        | 5.288        | 4.879         | 3.517        | 3.246        |
| % Variance                         | 34.882       | 20.339       | 18.767        | 13.528       | 12.485       |
| Cumulative %                       | 34.882       | 55.221       | 73.987        | 87.515       | 100.000      |
| <i>Factor loading/eigen vector</i> |              |              |               |              |              |
| Moisture                           | 0.404        | 0.487        | 0.729         | 0.228        | -0.129       |
| Ash                                | -0.276       | <b>0.948</b> | 0.113         | 0.014        | 0.108        |
| TSS                                | -0.790       | 0.308        | -0.519        | -0.101       | -0.030       |
| Prot                               | -0.309       | 0.283        | -0.464        | -0.014       | -0.780       |
| TS                                 | <b>0.920</b> | -0.160       | 0.023         | 0.310        | 0.179        |
| RS                                 | <b>0.955</b> | 0.210        | -0.048        | 0.155        | 0.129        |
| NRS                                | 0.803        | -0.357       | 0.061         | 0.420        | 0.217        |
| VTC                                | 0.442        | -0.256       | 0.749         | 0.420        | 0.041        |
| Eng                                | -0.214       | 0.752        | -0.379        | -0.094       | -0.485       |
| Na                                 | -0.612       | -0.729       | 0.016         | 0.266        | 0.149        |
| K                                  | -0.824       | 0.062        | -0.031        | 0.152        | 0.541        |
| Mg                                 | 0.099        | -0.297       | 0.692         | 0.516        | 0.396        |
| Zn                                 | 0.063        | <b>0.948</b> | -0.226        | -0.051       | -0.208       |
| Cu                                 | -0.145       | 0.237        | -0.191        | <b>0.939</b> | -0.068       |
| Ni                                 | 0.025        | -0.192       | -0.307        | -0.116       | <b>0.924</b> |
| Co                                 | -0.019       | -0.067       | <b>-0.899</b> | 0.340        | 0.269        |

|      |              |              |        |              |        |
|------|--------------|--------------|--------|--------------|--------|
| Mn   | -0.129       | <b>0.963</b> | -0.116 | -0.185       | 0.091  |
| Cr   | -0.470       | -0.300       | 0.808  | 0.123        | -0.147 |
| Cd   | <b>0.963</b> | -0.112       | 0.040  | 0.215        | -0.108 |
| Hg   | 0.346        | -0.040       | 0.100  | <b>0.935</b> | -0.063 |
| Pb   | 0.212        | -0.633       | -0.731 | 0.131        | -0.047 |
| DPPH | 0.264        | -0.335       | 0.229  | 0.872        | -0.066 |
| IC50 | -0.124       | -0.182       | -0.397 | -0.427       | 0.782  |
| MCC  | 0.277        | -0.282       | 0.005  | <b>0.918</b> | -0.033 |
| TPC  | 0.150        | -0.330       | 0.885  | -0.110       | -0.271 |
| TFC  | 0.213        | 0.254        | 0.513  | 0.250        | 0.157  |

Where TSS: Total Soluble Solid, Prot: Protein, TS: Total Sugar, RS: Reducing Sugar, NRS: Non-Reducing Sugar, VTC: Vitamin C, Eng: Energy value, Na: Sodium, K: Potassium, Mg: Magnesium, Zn: Zinc, Cu: Cupper, Ni: Nickel, Co: Cobalt, Mn: Manganese, Cr: Chromium, Cd: Cadmium, Hg: Mercury, Pb: Lead, DPPH: 2,2diphenyl-1-picrylhydrazyl, IC50: Half- maximal inhibitory concentration, MCC: Metal Chelating Capacity, TPC: Total Phenolic Content, TFC: Total Flavonoid Content. Extraction Method: Principal Component Analysis. Rotation Method: Varimax with Kaiser Normalization.
